# Supplementary material for: New heteroleptic [Ni(ii) 1,1-dithiolate-phosphine] complexes: synthesis, characterization and electrocatalytic oxygen evolution studies
Source: Royal Society of Chemistry journal article supplement (doi:10.1039/c9dt04923a), 2020-01-01
Supplement: c9dt04923a1.pdf [file c9dt04923a1.pdf]

## Supplementary Information

### **New Heteroleptic [Ni(II) 1,1-Dithiolate-Phosphine] Complexes: Synthesis, Characterization and Electrocatalytic Oxygen Evolution Studies‡**

Anamika,<sup>a</sup> Dharmendra Kumar Yadav,<sup>a</sup> Krishna K. Manar,<sup>a</sup> Chote Lal Yadav,<sup>a</sup> Kamlesh Kumar  
<sup>a</sup> Vellaichamy Ganesan,<sup>a</sup> Michael G. B. Drew<sup>b</sup> and Nanhai Singh<sup>a\*</sup>

<sup>a</sup>Department of Chemistry, Institute of Science, Banaras Hindu University, Varanasi 221005, India.

<sup>b</sup>Department of Chemistry, University of Reading, Whiteknights, Reading, RG6 6AD, UK

E-mail: [nsinghbhu@gmail.com](mailto:nsinghbhu@gmail.com), [nsingh@bhu.ac.in](mailto:nsingh@bhu.ac.in)

‡ Part of the work was presented at the (CTFM-2019): CONTEMPORARY TRENDS AND FUTURE PROSPECTS OF FUNCTIONAL MATERIALS, November 29–30, 2019, Banaras Hindu University, Varanasi, India.

### **Table of Contents**

**Fig. S1:** Simulated and experimental PXRD patterns of complexes **1-4**.

**Fig. S2:** IR spectra of complexes **1-4**.

**Fig. S3:** <sup>1</sup>H, <sup>13</sup>C{<sup>1</sup>H} and <sup>31</sup>P{<sup>1</sup>H} spectra of complexes **1-4**.

**Fig. S4:** Non-covalent interactions in complexes **1-4**.

**Table S1:** Weak secondary interactions and their parameters observed in complexes **1-4**.

**Fig. S1:** Simulated and experimental PXRD patterns of complexes 1-4.

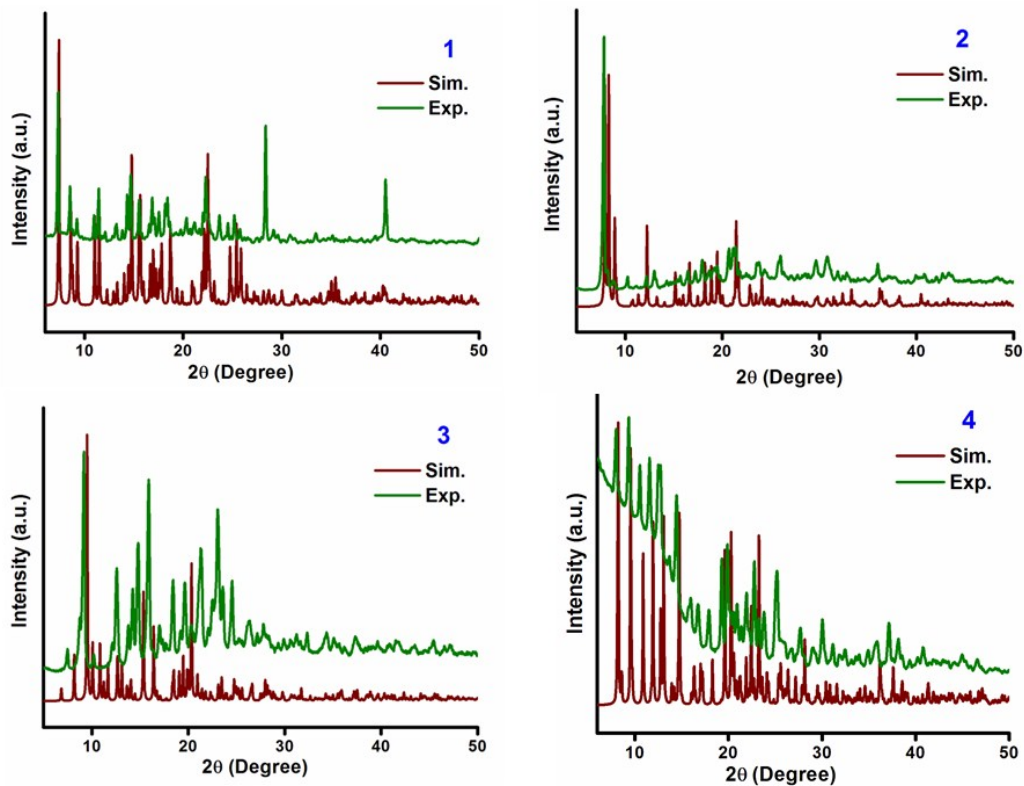

**Fig. S2:** IR spectra of complexes 1-4.

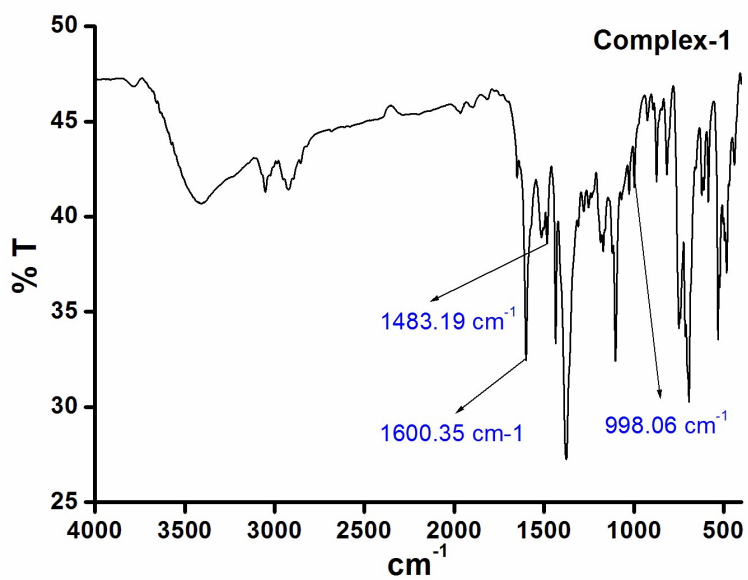

**Spectrum a:** IR spectrum of complex 1.

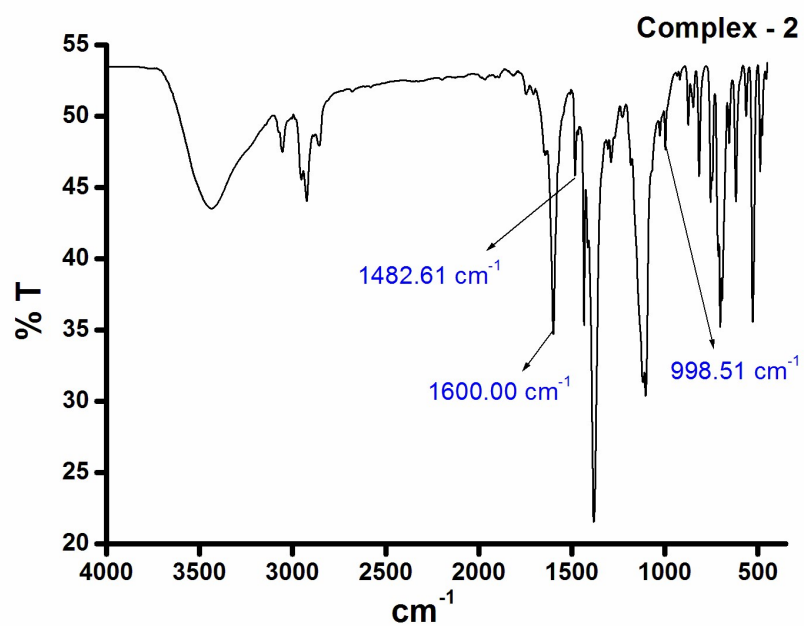

Spectrum b: IR spectrum of complex 2.

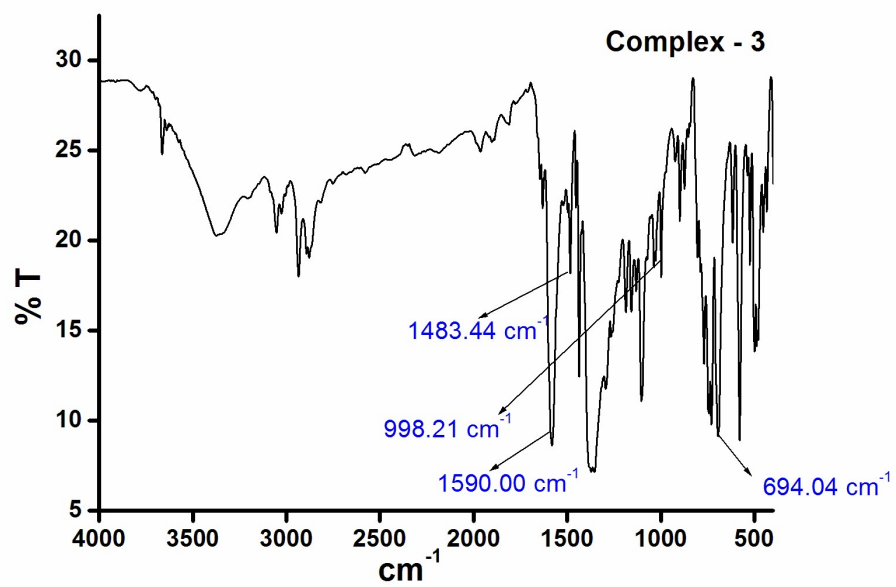

Spectrum c: IR spectrum of complex 3.

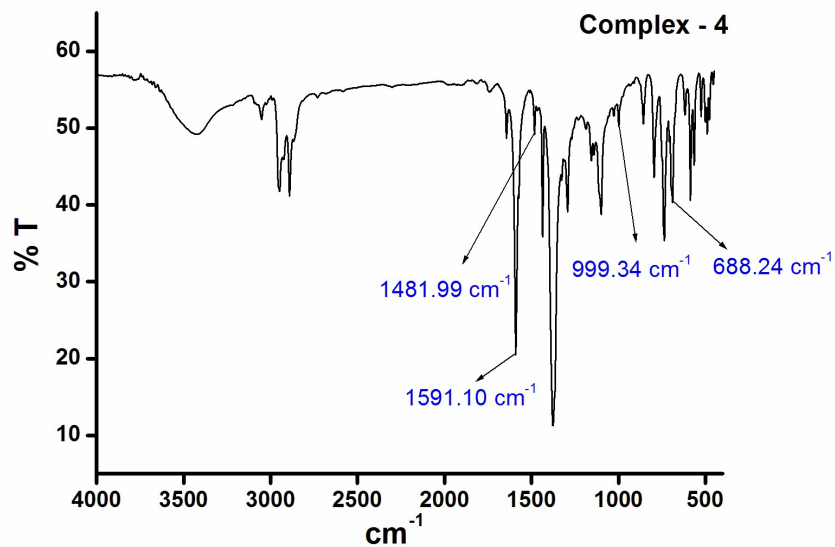

**Spectrum d:** IR spectrum of complex 4.

**Fig. S3:**  $^1\text{H}$ ,  $^{13}\text{C}\{^1\text{H}\}$  and  $^{31}\text{P}\{^1\text{H}\}$  spectra of complex 1-4.

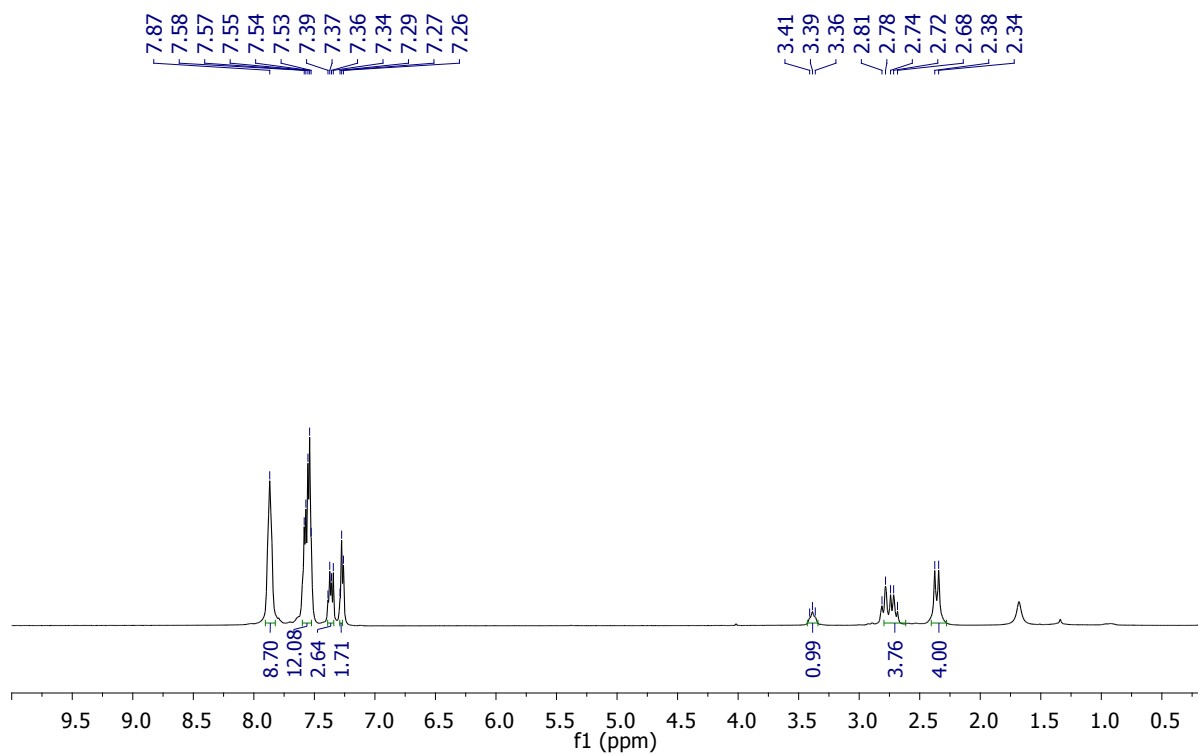

**Spectrum 1a:**  $^1\text{H}$  NMR (500 MHz,  $\text{CDCl}_3$ ) of complex 1

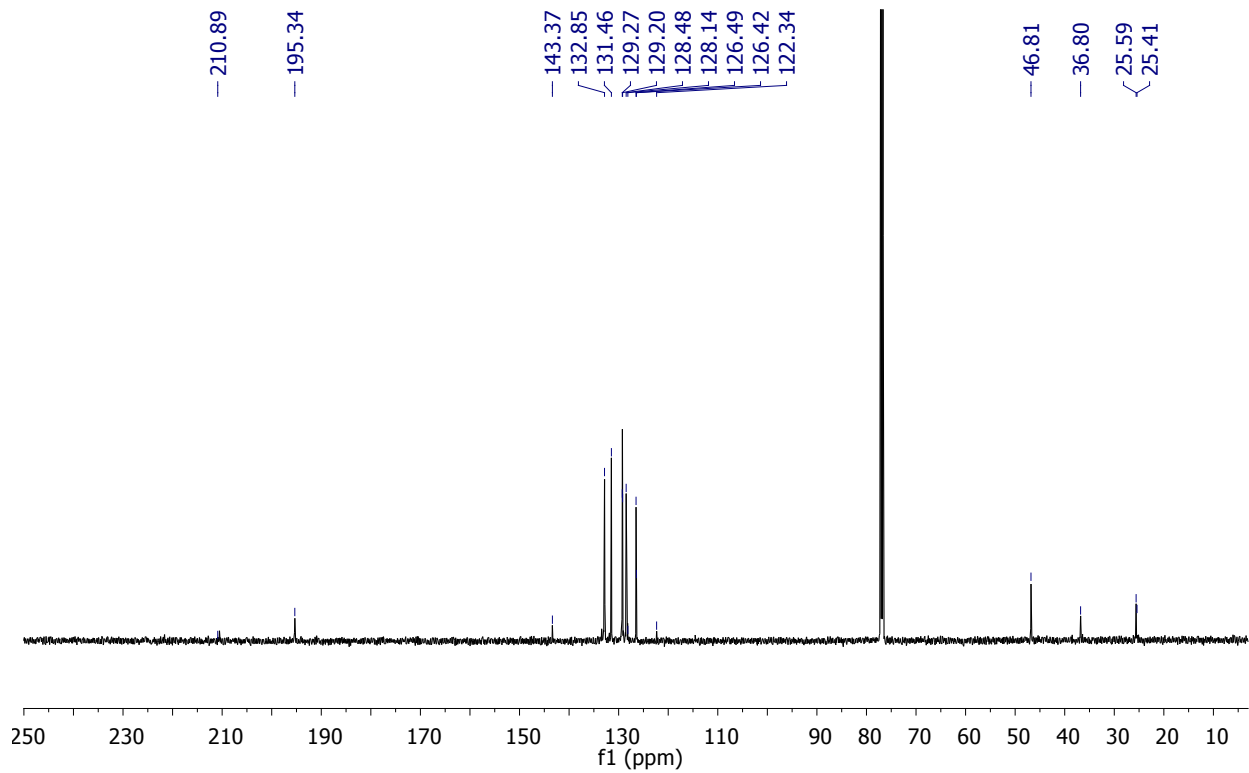

**Spectrum 1b:**  $^{13}\text{C}\{^1\text{H}\}$  NMR (125 MHz,  $\text{CDCl}_3$ ) of complex **1**

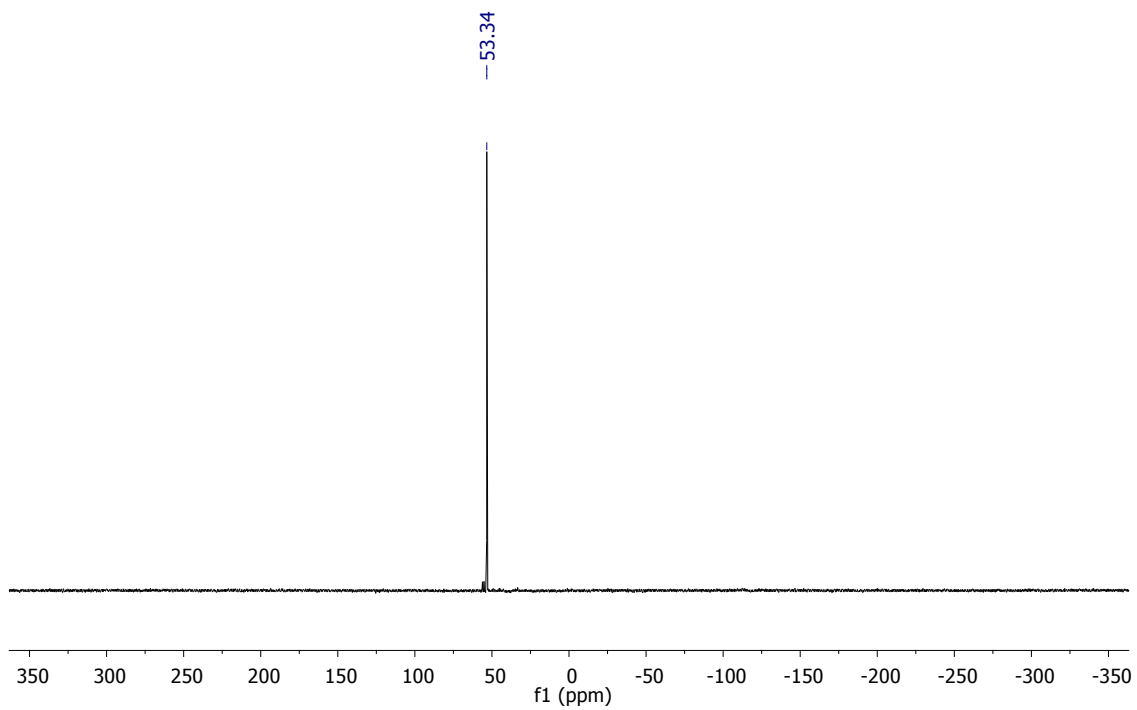

**Spectrum 1c:**  $^3\text{P}\{^1\text{H}\}$  NMR (202 MHz,  $\text{CDCl}_3$ ) of complex **1**

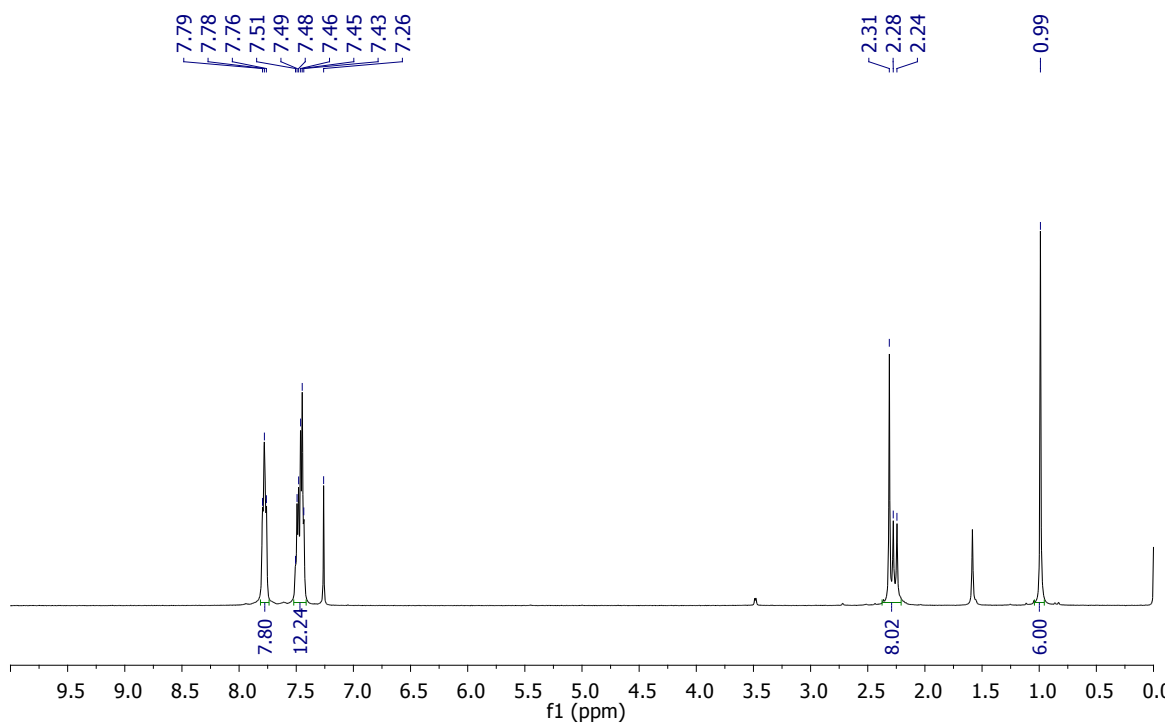

**Spectrum 2a:**  $^{13}\text{C}$  NMR (500 MHz,  $\text{CDCl}_3$ ) of complex **2**.

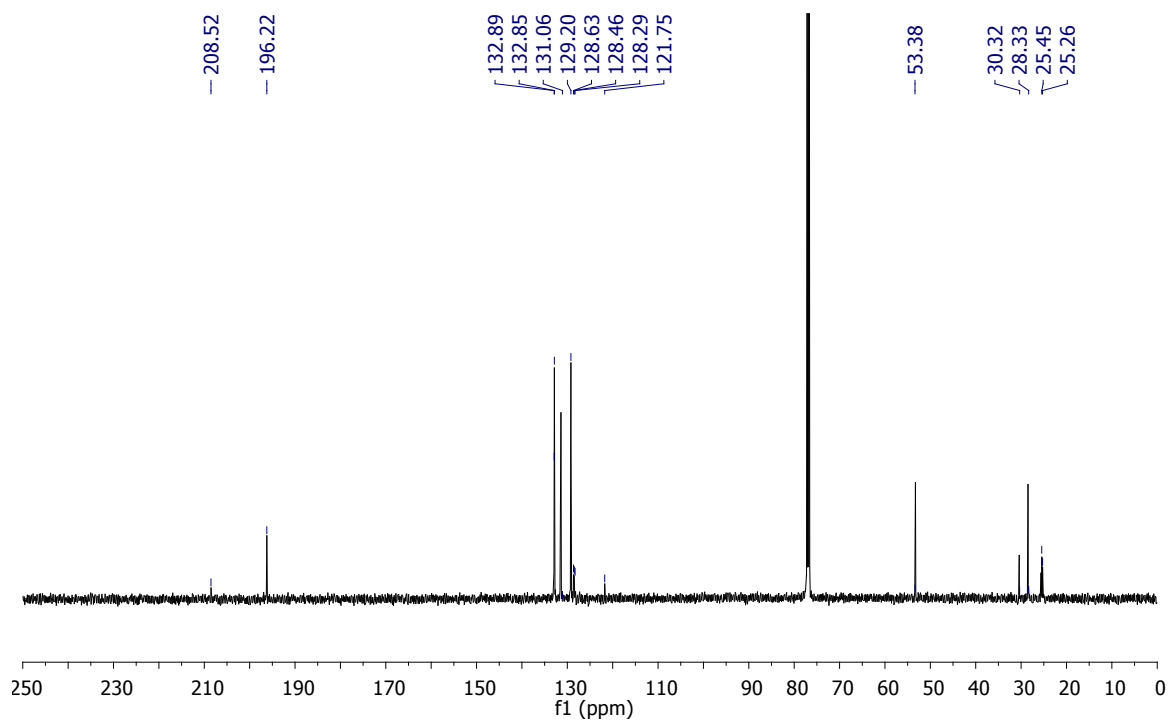

**Spectrum 2b:**  $^{13}\text{C}$  NMR (125 MHz,  $\text{CDCl}_3$ ) of complex **2**.

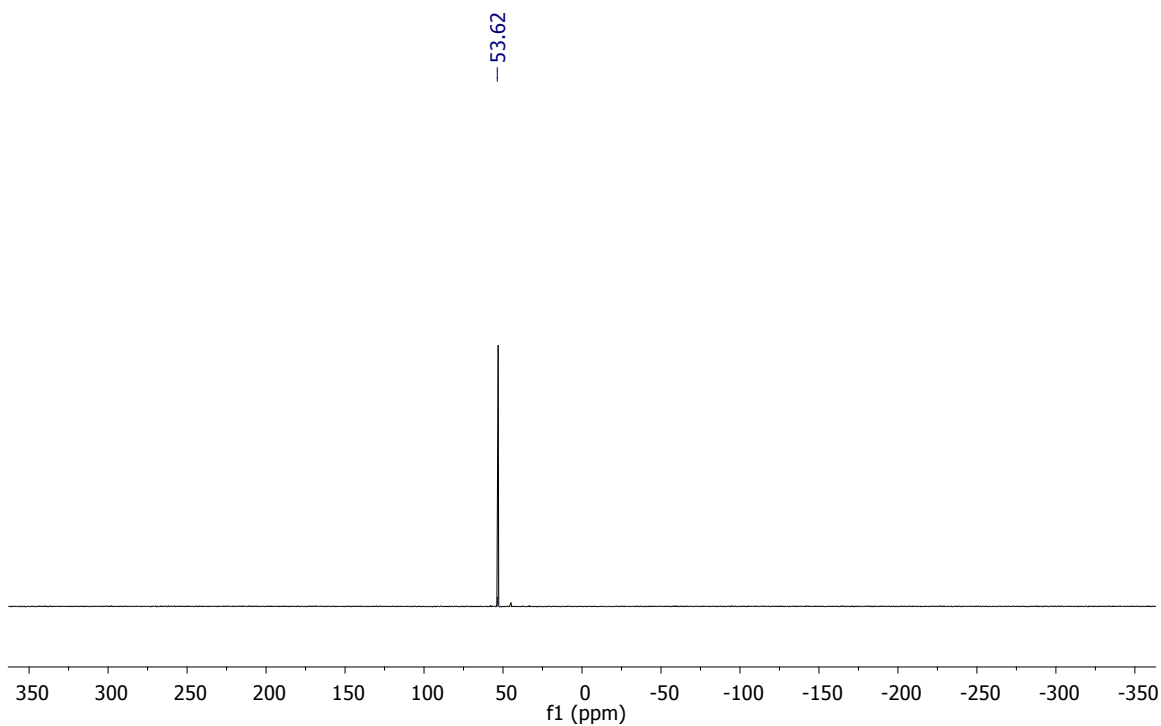

**Spectrum 2c:**  $^1\text{H}$  NMR (202 MHz,  $\text{CDCl}_3$ ) of complex **2**

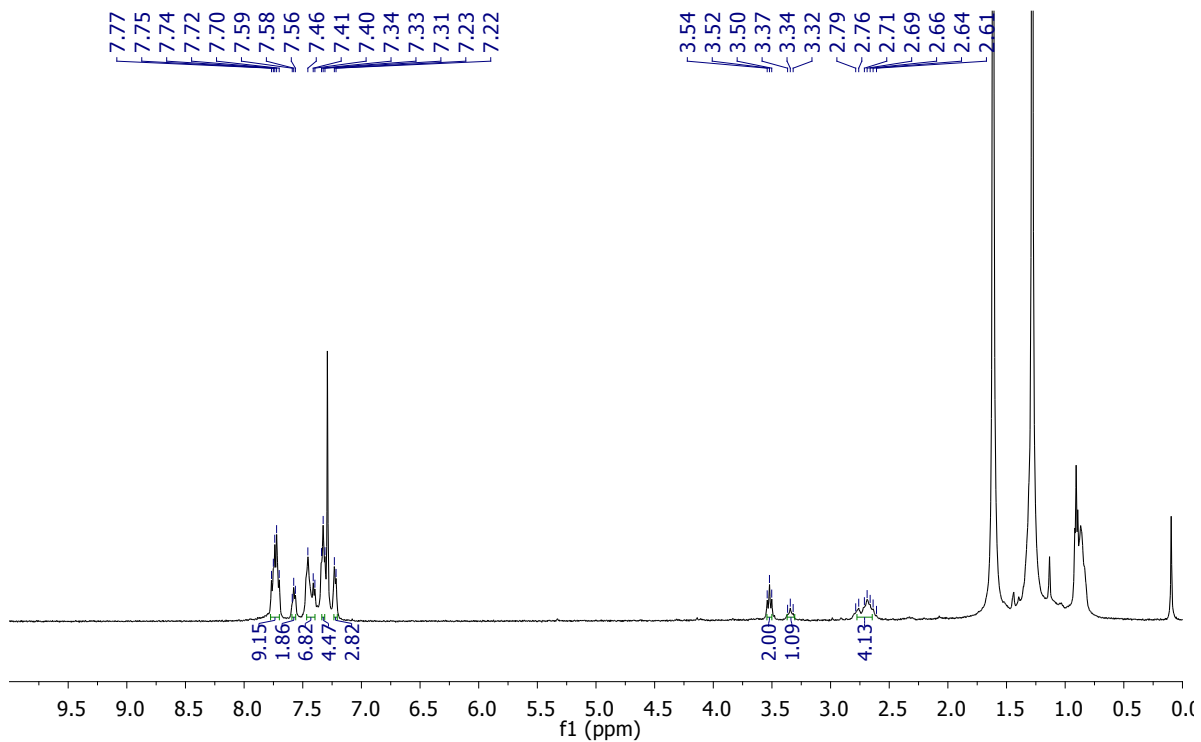

**Spectrum 3a:**  $^1\text{H}$  NMR (500 MHz,  $\text{CDCl}_3$ ) of complex **3**.

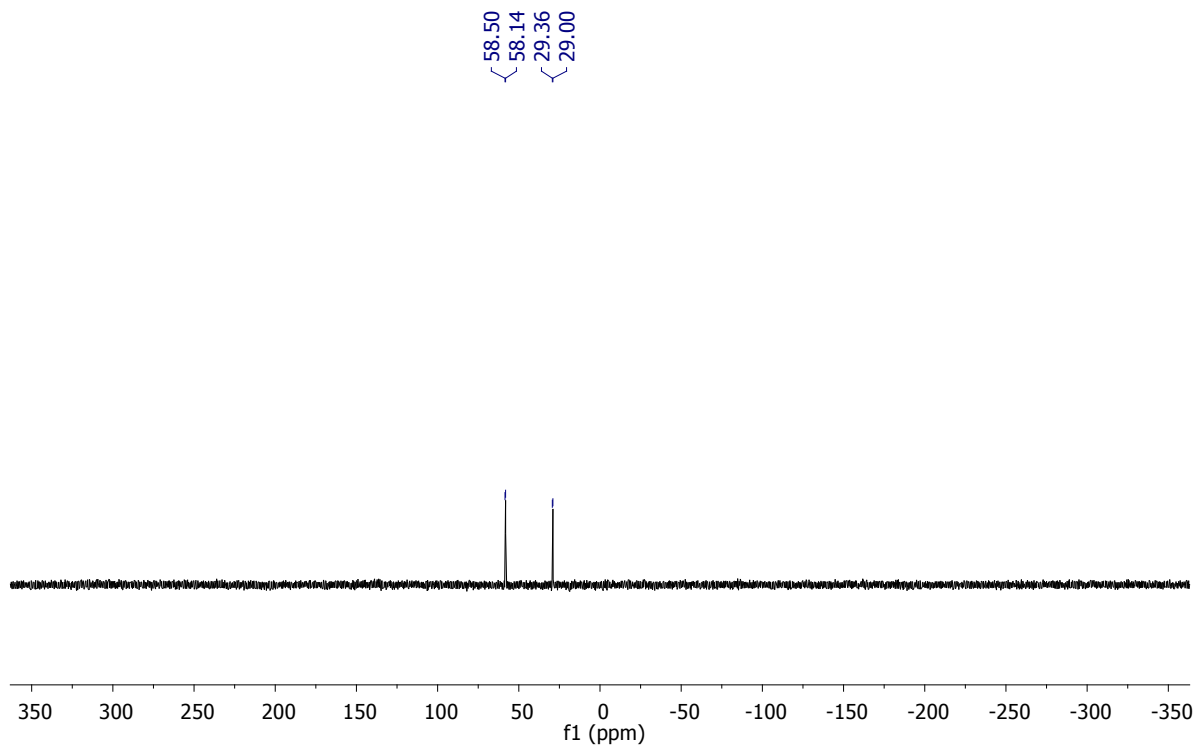

**Spectrum 3b:**  $^{31}\text{P}\{^1\text{H}\}$  NMR (202 MHz,  $\text{CDCl}_3$ ) of complex **3**

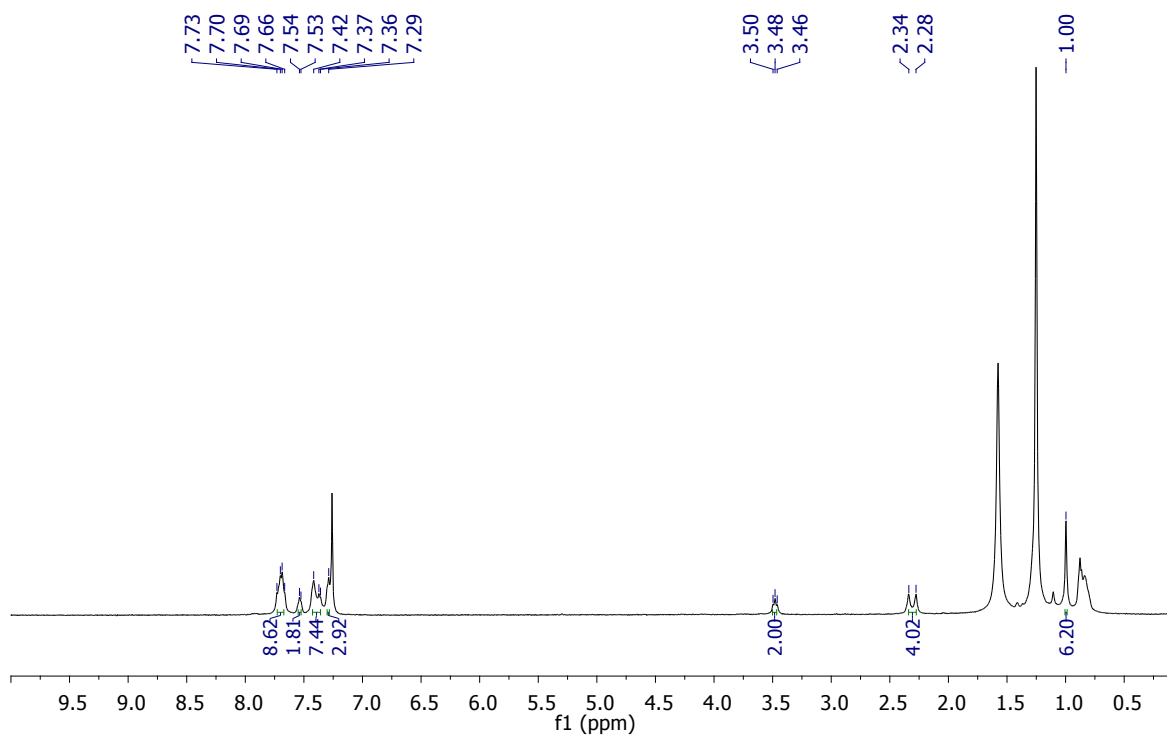



**Spectrum 4a:**  $^1\text{H}$  NMR (500 MHz,  $\text{CDCl}_3$ ) of complex **4**.

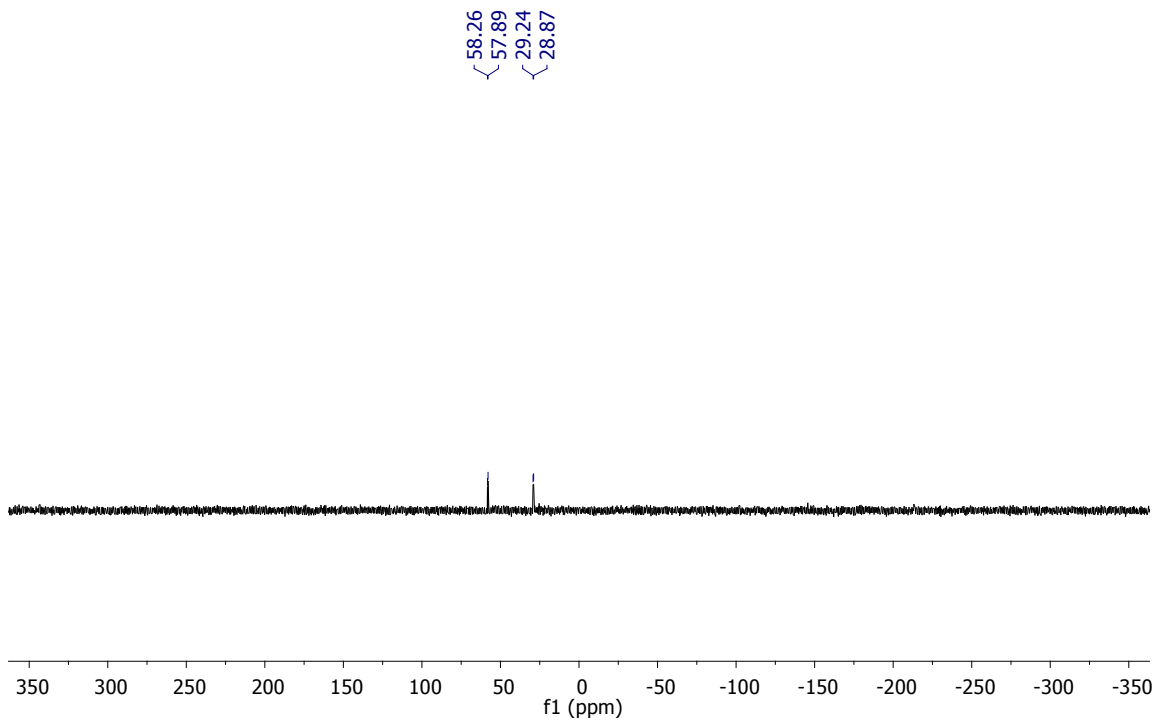

**Spectrum 4b:**  $^{31}\text{P}\{^1\text{H}\}$  NMR (202 MHz,  $\text{CDCl}_3$ ) of complex **4**.

**Fig. S4 :** Non-covalent interactions in complexes **1-4**.

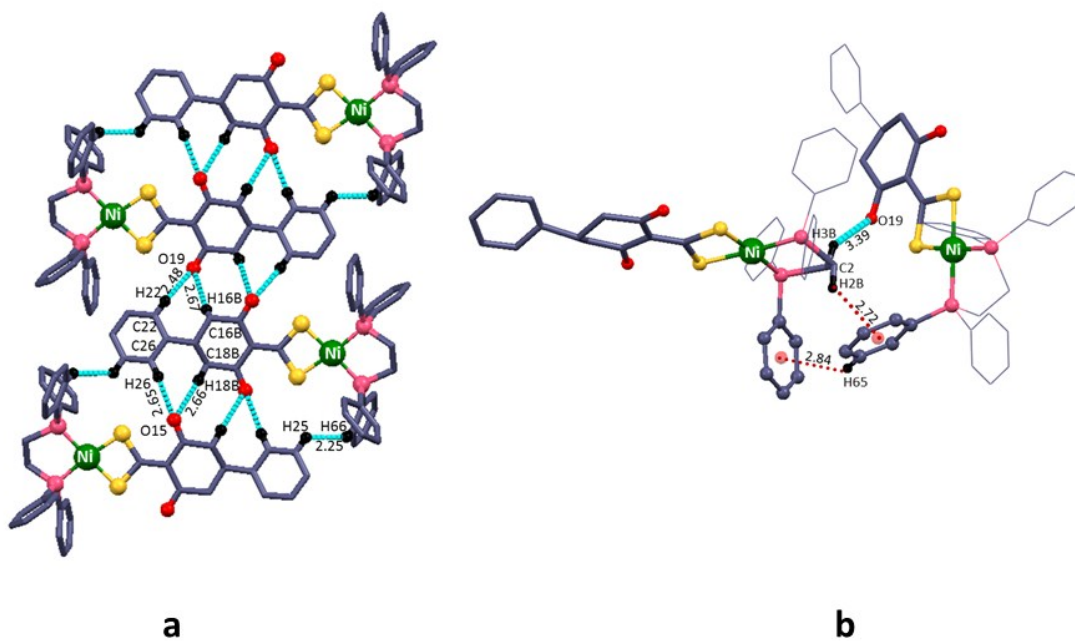

**Fig. S4. 1** (a) Supramolecular network sustained via C-H $\cdots$ O, H $\cdots$ H and (b) C-H $\cdots$  $\pi$  and C-H $\cdots$ O interactions in **1**.

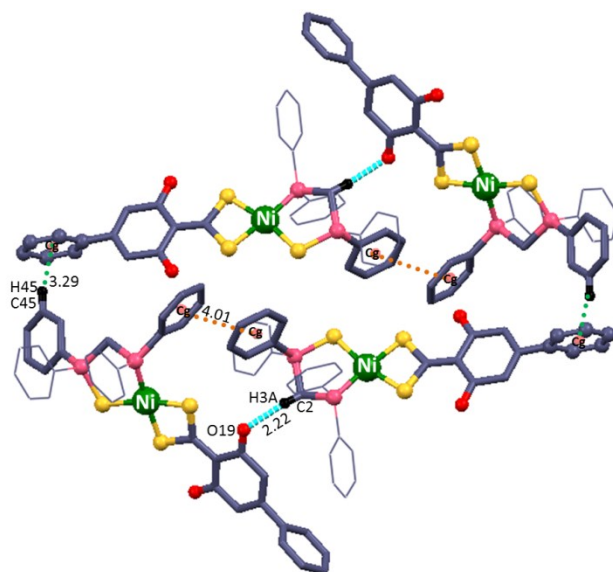

**Fig. S4. 2** Supramolecular structure sustained via C-H $\cdots$ O, C-H $\cdots$  $\pi$  and  $\pi$   $\cdots$   $\pi$  interactions in **3**.

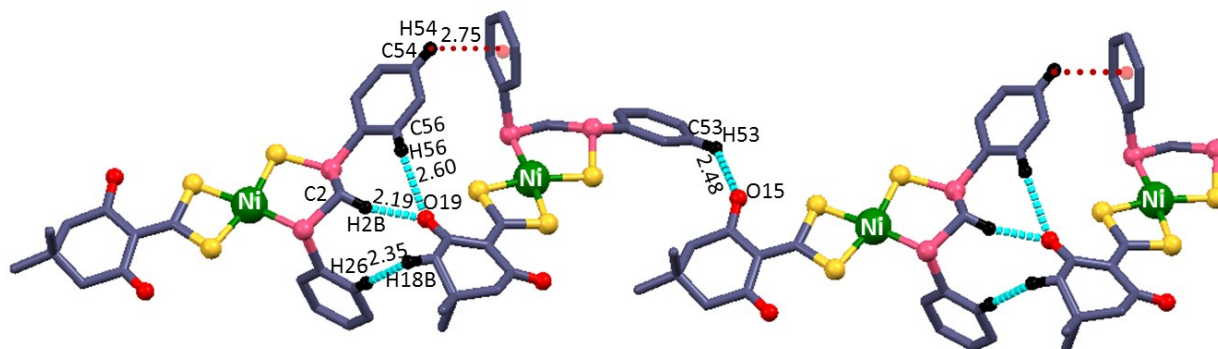

**Fig. S4. 3** 1-D Polymeric structure of **4** sustained by C-H $\cdots$ O, H $\cdots$ H and C-H $\cdots$  $\pi$  interactions.

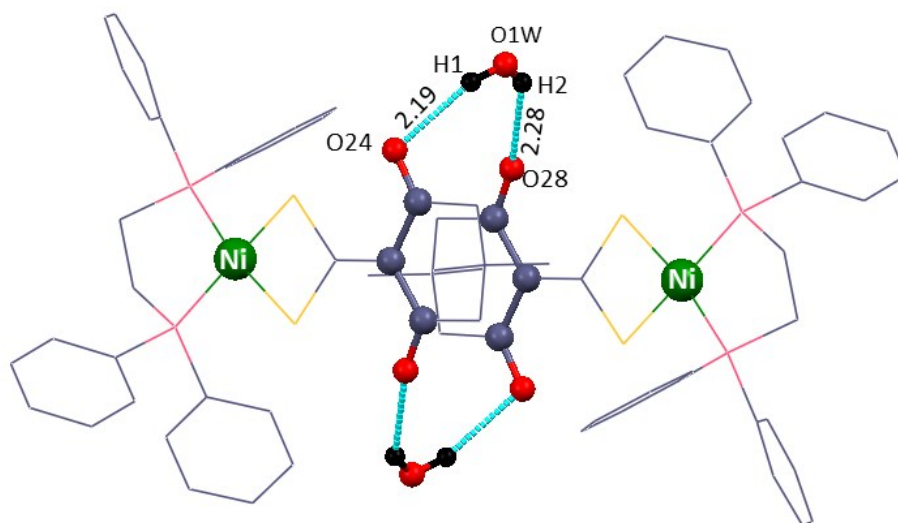

**Fig. S4. 4** The C–O···H–O hydrogen bonding interactions in complex **2**.

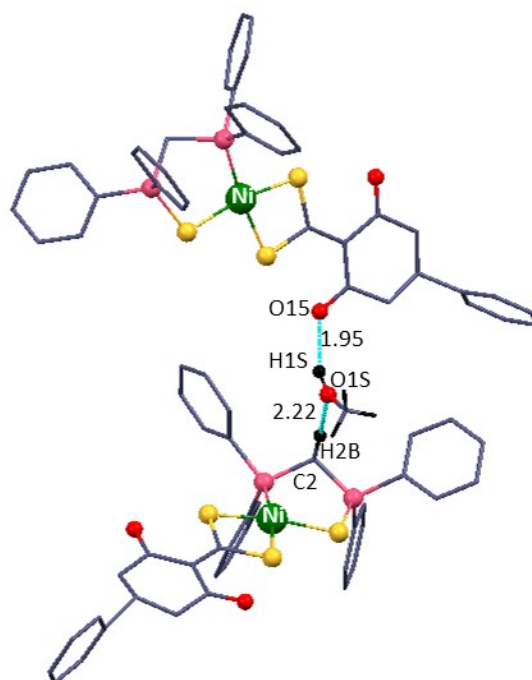

**Fig. S4. 5** The C–O···H–O hydrogen bonding interaction and C–H···O interaction in complex **3**.

**Table S1:** Weak secondary interactions and their parameters observed in compounds **1- 4**.

| Donor (D)-acceptor (A) hydrogen bonds (Å, °) |                           |                    |                     |          |                    |
|----------------------------------------------|---------------------------|--------------------|---------------------|----------|--------------------|
| Complex                                      | D–H···A                   | d( H···A)          | d( D···A)           | ∠D–H···A | Symmetry Element   |
| <b>1</b>                                     | C(22)–H(22)···O(19)       | 2.48               | 3.408(5)            | 175      | -x,-y,1-z          |
|                                              | C(16B)–H(16B)···O(19)     | 2.67               | 3.626(4)            | 167      | -x,-y,1-z          |
|                                              | C(26)–H(26)···O(15)       | 2.65               | 3.528(5)            | 157      | 1-x, -y, 1-z       |
|                                              | C(18A)–H(18C)···O(15)     | 2.61               | 3.548(5)            | 162      | 1-x,-y,1-z         |
|                                              | C(3)–H(3B)···O(19)        | 2.39               | 3.233(4)            | 145      | x, -y+1/2, z-1/2   |
| <b>2</b>                                     | C(54)–H(54)···O(19)       | 2.37               | 3.303(4)            | 176      | 3/2-x,1/2+y,z      |
|                                              | C(2)–H(2B)···O(15)        | 2.58               | 3.209(4)            | 123      | 1-x, 1/2+y,1/2-z   |
| <b>3</b>                                     | C(2)–H(2A)···O(19)        | 2.23               | 3.097(6)            | 148      | x,1/2-y,z-1/2      |
|                                              | C(2)–H(2B)···O(15)        | 2.22               | 3.173(7)            | 165      | x,y,z              |
| <b>4</b>                                     | C(56)–H(56)···O(19)       | 2.60               | 3.445(5)            | 153      | 1/2-x,y-1/2, 3/2-z |
|                                              | C(53)–H(53)···O(15)       | 2.48               | 3.157(6)            | 130      | 3/2-x,y-1/2,3/2-z  |
|                                              | C(2)–H(2B)···O(19)        | 2.19               | 3.126(5)            | 160      | 1/2-x,y-1/2, 3/2-z |
| <b>Complex</b>                               |                           |                    |                     |          |                    |
| Complex                                      | H···H                     | H···H              | Symmetry element    |          |                    |
| <b>1</b>                                     | H(66)···H(23)             | 2.26               | -x,-y,1-z           |          |                    |
| <b>2</b>                                     | H(43)···H(21B)            | 2.38               | x,1/2-y,-1/2+z      |          |                    |
| <b>4</b>                                     | H(26)···H(18B)            | 2.35               | 1/2-x,y-1/2,3/2-z   |          |                    |
| <b>Complex</b>                               |                           |                    |                     |          |                    |
| Complex                                      | C–H···π / π ···π          | C–H···π/<br>π ···π | Symmetry element    |          |                    |
| <b>1</b>                                     | C(65)–H(65)··· π(C71–C76) | 2.84               | x,1/2-y, z+1/2      |          |                    |
|                                              | C(2)–H(2B)··· π(C61–C66)  | 2.72               | x,1/2-y,z-1/2       |          |                    |
| <b>2</b>                                     | C(34)–H(34)··· π(C61–C66) | 3.16               | 1-x,1/2+y,1/2-z     |          |                    |
| <b>3</b>                                     | C(45)–H(45)··· π(C21–C26) | 3.29               | 1-x,1/2-y,1/2+z     |          |                    |
| <b>π ···π</b>                                |                           |                    |                     |          |                    |
| <b>4</b>                                     | C(54)–H(54)··· π(C21–C26) | 2.75               | 1/2-x, y-1/2, 3/2-z |          |                    |
